# Supplementary material
Source: Springer Nature journal article supplement (https://www.springerprofessional.de/resource/supplementary/13638_2014_1022_MOESM8_ESM.pdf/11899068)
Supplement: MOESM8 [file 11899068]

Electric Utility  
Power System  
(Utility)

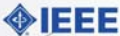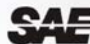

J2847, J2836, J2293 –  
communication & energy  
transfer V2G/G2V

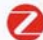

ZigBee™ Smart Energy 2.0

**Alliance**  
Electric Vehicle  
Energy Transfer  
System  
(EV – ETS)

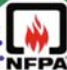

Electric  
Vehicle  
Supply  
Equipment  
(EVSE)

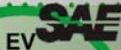

Batteries  
J1798 Performance  
J2929 Safety  
J537 Storage

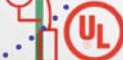

ANSI

NEMA

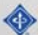

IEEE 1547 (Distributed energy  
interconnection)

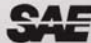

J1772 Electric Vehicle Coupler,  
V2G, G2V

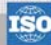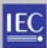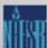

OASIS
